# Supplementary material for: Simulating the Tone River eastward diversion project in Japan carried out 4 centuries ago
Source: Copernicus journal article supplement (doi:10.5194/hess-29-753-2025), 2025-02-07
Supplement: Supplementary file 1 [file hess-29-753-2025-supplement.zip]

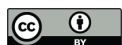

*Supplement of*

## **Simulating the Tone River eastward diversion project in Japan carried out 4 centuries ago**

**Joško Trošelj and Naota Hanasaki**

*Correspondence to:* Joško Trošelj ([josko.troselj@irb.hr](mailto:josko.troselj@irb.hr))

- [hess-29-753-2025-supplement-title-page.pdf](#)
- [Supplement.docx](#)

The copyright of individual parts of the supplement might differ from the article licence.
